# Supplementary material
Source: Research Square preprint supplement (doi:10.21203/rs.3.rs-9879337/v1)
Supplement: Supplementary file 1 [file d33cc8b215e084f0e3ccdcf5.xlsx]

## Sheet: Fig1 b
	cell number	Library	Hit	MocK	NC	RBV
P	5064				98.8502
P	6371.67				99.0305
P	6683.67				99.0606
C	6980.33			0
C	7577.67			0
C	8206.67			0
142-1	5602.67	84.2363
CZ-15	6854.67	99.1774
145-1	6067.33	92.2916
147-2	6302	92.8619
CY-1	7300	99.3888
STZ-5	6037.33	98.0472
CZ-12	7072	99.0297
139-1	6448	74.5218
72-2	5701.67	95.5434
70-1	6744.33	99.2788
75-1	7087	99.4227
73-1	7020.67	99.4195
65-3	6499.67	95.1401
73-2	6385	81.8395
76-1	6809.67	99.2028
75-2	6277.33	87.7635
59-1	5795.33	93.346
B-1	6745	99.1208
47-1	6782	96.4027
48-1	6822.67	95.8691
42-1	7124	94.5521
粪3-2	6637	99.3141
850-2	6768	98.9049
50-1	6699.33	95.3729
13-3	6454.33	98.8103
B-2	6642.67	99.291
56-1	6610.33	95.5218
41-1	7065.33	96.9812
44-1	6950.67	96.3942
45-1	6445	97.6054
60-1	6898.33	95.1525
850-1	6026.67	98.5336
53-1	6297.67	91.6284
88-1	6586.67	97.1585
52-1	6709.67	97.2272
54-1	6643.33	96.9477
46-1	6945.33	97.5168
B-4	6453	99.3211
20-1	6886.33	64.5422
26-2	6392	82.2605
70-2	6772	82.2071
84-1	6668	78.5741
12-2	7251.33	99.4214
68-2	6540.33	92.0201
51-1	6850	80.4574
74-2	6708.67	99.3192
1	6349	95.5166
72-1	6350.67	77.6799
11-3	6212.67	91.294
3-1	6910.67	96.291
31-1	6578	99.0875
8-1	7226.67	95.338
11-2	6506	99.2651
18-2	6178.33	99.1023
33-1	6628	95.7848
32-2	6160.67	98.8446
113-1	6612	74.7664
5-1	6896.67	99.26
6-1	7246	90.7868
10-1	7167	91.3137
4-1	6852.33	91.2338
17-2	6548	87.4428
14-1	6525	99.1737
30-1	6925.67	77.197
27-1	6756.33	91.7238
2-1	6547.33	96.598
74-1	6540	90.8111
1-6	6819.67	92.1978
1-1	7631	85.3765
32-1	6987.67	96.2134
40-1	7024	99.1885
1-2	6634.33	86.1516
22-1	6929.33	71.2808
28-1	6042	93.7594
36-1	6844.67	99.4276
19-1	7058.67	70.5771
35-2	6679	90.2629
89-1	6644	98.8919
57-1	7193.67	89.5068
35-3	6748.33	94.7762
P	6955.87				98.9737
P	7446.83				98.8387
P	6900.6				99
C	6458.63			0
C	6421.07			0
C	6848.07			0
19-2	6430.7	98.4876
A-2	7104.33	99.1538
38-1	6559.53	91.8065
3	7182.4	99.4042
6-2	6579.67	98.1258
A-1	6388.73	99.3607
24-1	7518.03	99.3783
26-1	7097.17	49.5587
132-1	6149.03	95.6527
CZ-24	7653.83	99.3609
CZ-11	7361.37	99.3754
138-2	6779.5	99.3385
SJZ-1	6870.7	93.1552
SIZ-3	7501.57	99.1898
128-1	6571	97.3645
CY-2	6880.53	96.5925
120-2	5250.5	97.8445
112-1	6306.43	98.8865
104-2	4874.23	97.5924
105-1	5000.07	99.1919
CZ22	6746.3	98.9415
118-1	7208.6	99.2444
116-1	6828.57	98.3351
120-3	6484.07	98.7679
83-2	6661.63	82.5235
85-2	7161.6	71.2852
71-1	7107.9	99.3511
88-2	6723.93	90.5738
80-1	6387.97	76.1356
85-1	6873.67	99.4802
83-2	6607.87	84.4482
39-1	6870.23	70.0219
114-1	6852.57	98.6945
104-1	7664.97	99.3558
102-1	7469.67	99.4541
121-1	6404	99.0981
108-1	7249.37	99.4375
124-1	7168.8	99.3683
121-2	7098.47	99.3296
118-2	6733.5	98.5181
117-2	6726.53	98.6372
102-4	7655.87	99.2564
112-2	7524.53	99.4018
122-2	6508.57	97.8224
67-1	7189.47	98.9817
78-1	6789.27	85.272
A-3	6499.57	97.086
66-1	7016.57	98.7108
108-1	6544.07	98.4157
115-1	6906.97	88.3434
127-1	6898.67	98.292
126-1	7188.97	99.4533
119-1	6998.23	99.3339
104-4	6749.97	97.8831
35-1	6856.3	99.3922
11-1	7029.53	96.4205
144-1	6880.23	90.4511
105-2	7770.87	99.4175
107-2	7069.53	89.099
123-1	7583.83	99.1533
115-1	7071.97	99.3198
116-2	6645	93.8021
111-2	7099.97	99.3937
120-1	6569.73	96.1238
127-2	6830.77	99.029
104-3	7261.1	91.506
120-3	6896.43	99.5093
111-1	7719.13	99.307
117-3	6638.87	96.4523
116-3	6884.73	99.3504
114-2	7196.37	99.342
102-1	7552.43	99.3407
122-1	7318.13	99.0315
105-3	6454.63	97.1089
103-1	7296.57	59.9427
117-1	7741.5	99.351
103-2	6774.63	96.5898
119-2	7223.7	99.2996
124-2	7145.9	99.1989
107-5	7714.47	99.267
P	6932				99.1263
P	7329.67				99.3866
P	7560.67				99.0325
C	6931.33			0
C	6991.67			0
C	7508.67			0.0111582
CY5	6281.33	99.1089
136-3	6436	95.6177
141-1	6047.33	96.1855
WH-1	7350	99.5502
129-1	6533.33	97.7609
148-2	6859.67	99.4656
49-1	6954	98.2824
55-1	6952.33	96.1915
135-1	6135.67	84.144
131-1	6758.33	98.4549
109-1	7353	99.5404
CZ-14	7609.67	99.5759
142-2	7026	99.5632
CZ-21	7020	99.379
SJZ-6	5967	99.3869
SJZ-4	6847	98.7599
138-1	5915.67	96.3223
146-1	6707.33	97.0706
144-2	6814	99.53
SJZ-2	6631.67	99.3261
CZ-13	7098	99.5755
143-1	6191.33	98.5837
130-1	6332.67	95.9618
137-1	6356.67	95.538
125-1	6028.67	95.3092
133-1	6765	91.508
134-1	5943	97.0647
136-1	6557	97.537
CY-4	7201	99.5662
CY-3	6128.67	99.289
140-1	6528.33	99.0727
72-4	6505.33	83.2762
91-2	6527	98.9973
87-2	6980	82.7856
81-2	7046.67	99.5727
81-1	6493.67	90.8675
86-1	6134.33	98.7215
89-2	6135	89.6311
82-1	6996	99.4575
87-1	6746	98.9742
98-1	6885	99.1291
90-2	7276	99.4757
92-2	6874.33	93.603
101-1	6777.67	93.4773
79-2	6613.67	89.7313
84-1	6924.33	99.3248
97-2	6698.67	84.9116
92-1	6581	98.6773
95-1	7135.33	99.1724
99-1	7522	99.5201
93-2	7237.33	99.5391
101-2	5967.67	99.2392
100-1	6590	82.4492
94-2	6604.67	99.455
91-1	4321.67	84.1601
90-1	6000.67	89.9809
83-1	6480.67	99.3761
79-1	7397	99.4364
68-1	7278.33	99.5455
46-1	7285	99.329
88-1	6842	85.2352
72-3	6873	99.4656
86-2	6832.67	99.3495
94-1	6179.67	33.0372
96-2	6953.67	78.874
93-1	6896	89.7447
113-1	6950.33	86.69
96-1	6317.67	99.62
98-2	6538	92.9948
99-2	6335.33	91.5874
97-1	6963.67	99.2419
100-2	6156.33	98.8262
37-3	7464	99.3844
25-1	7392.33	91.841
34-1	6960.33	88.3539
29-1	7357	99.5273
23-1	7074.33	97.1461
37-2	6921.67	99.4214
A99-2	7104	99.211
A100-1	6397	98.813
P	6993.67				99.5889
P	7280				99.8231
P	7370				99.8592
C	7716.33			0.0441468
C	7927.33			0.0147869
C	7379.33			0
AW17	7079.67	99.3937
17	7269	99.7844
1-1	7989.67	99.8448
枯4	7819.33	99.8687
AW10	7376	99.7871
枯3	7432	99.8056
天津-1贝	6470.67	82.9821
AW8	6377.33	67.5985
G	6114	56.6544
A14	7481.67	99.7235
BS12	7566.33	99.8661
F5-6	7490	99.8988
D1-1	6326.67		0.010632
A19-3	7463.67	99.3514
12	6787.33	35.1447
S3	7294	99.747
bsk9-2	6756.67	99.5411
13543	7242	99.8272
AM9	7103.33	99.8042
5-1	6565.33		19.434
枯草2-2	3569.67	56.2565
MA7	6271.67	93.4694
JDF-F2	6872	99.8027
BW10-1	6392.67	49.5184
TY-3	7147.33	99.5989
D4-2	7197	99.7458
B4	7843	99.7621
枯	6766.67	93.659
3-1	8035.67	99.8234
69-2	7739	99.7678
E	4258	11.8436
3	6810	99.6515
BSSX23	6868.67	77.5097
A69-3	7592.67	99.6969
WT-2原	7281.33	70.1144
天1	7740.33	99.8694
FSJ-3	6931	99.831
JM	7071.33	98.5353
A-1-3	6467.33	99.4604
134	6927.33	99.7077
华天	7048.33	26.8091
A12	7835.67	99.6758
华天瑞	7976.67	99.8525
双菌B2原	7578.33	99.8393
Tianjing	5793.33		4.31295
5-3	7357.67	99.9085
BSK14	7557	99.9111
A69-1	6602	99.6344
枯7	5230.67	1.91554
A83-1	6781.33	49.9591
解淀粉芽孢杆菌	8154.33	99.7909
MB10-1	6952.33	52.4799
天津-1枯	6787.33	54.5326
AW-2	4591.67	81.7427
4-1	7592.67	99.828
天天菌1	6195	94.4645
SXL365	7201.67	94.7856
FSJ-3	6612.33	99.7622
5-4	6738.67	88.1385
18021-4	6258	99.8114
DFJ2-1	5608.33	90.9512
双菌b2地衣	6798	52.3578
枯4	7388.33	99.898
B5	6928.67	99.7507
BS32	6468	99.5437
BS4-2	7063	44.202
C3102	7351.67	94.5129
BSK3-2	7347	99.8859
F3-2	7234.33	99.816
BS52	7197	99.8126
26503	5525	98.1901
屎肠A	5641.33	99.7029
D3-1	6761.67	99.6738
NS2-4	7307.67	99.7505
WXL	7882		19.8252
N4-1	7633	91.5506
B	6016	87.6144
B-3	7856	99.8615
双菌B2原	5126	99.5673
C	5081.67	45.6803
D3-2	6360.33	99.5429
D2-1-1	5288.67	99.7597
JDF-2号	5273	64.5502
HENGXING2-1	7269	99.7971
天天菌1原	6306.33	66.1655
3346-2	6467.67	66.074
NE20-2	6620.67	99.6476
AS3-1	5734	35.1822
P	6628.33				99.566
P	6933				99.8249
P	6963.67				99.8488
C	7505.33			0.0401012
C	6977.67			0.0144686
C	6826.33			0
BAWJ-1-1	5859	99.3428
J	6633.33	99.7923
A2	5871	99.8109
C3012	6560	99.8587
天津-3	7064	99.7909
常牧-1	6794.67	99.7983
常牧-1	5971	83.0274
CF2-1	6251.33	66.3793
4R	6789	55.5908
D2-1	6614.67	99.7126
枯1	7093	99.8777
A14	7376.67	99.8941
F3-3	5027	0
1-8	5935.33	99.4217
67	6137	35.9207
141207	6322.33	99.751
18021-3	6643.33	99.526
BS4-3	6782	99.8091
枯7	5568.33	99.7983
A14	5117.67	25.343
科	6715.33	55.9044
TTJ-1	6716	93.9563
WJ-2A解淀粉	6573.33	99.7852
19	6731	49.0012
BS5-2	6345.67	99.604
BSIO13	6334.67	99.7625
BS5-2	7073.67	99.7797
BSA-1	6626	94.1688
9-1	6347.67	99.8292
N5754	6550.33	99.7724
Yanping	7317.67		11.4021
AW12	6248.33	99.6555
A10	6800.67	77.2122
5-3	6297.33	99.7253
A13	7475.33	70.1266
枯6	7601.67	99.8668
华裔	3191.33	99.8367
D1-3	7124.67	98.5815
10-2	7422.67	99.5232
d2-6	6829.33	99.6961
枯5	6201.33	26.4807
AM17	7536.67	99.6635
BS5-1	6469	99.8473
AW8	6796.67	99.823
DZJF-2	7477.67		0
34-3	7631	99.9161
D2-2	7286.33	99.9037
2-1	6656.33	99.6606
8-1	4392.33	0
A69-3	6358.67	50.1327
5-1	6668	99.7991
天津-1枯	7408.67	52.0035
绿奥	7516.33	54.1561
18021-1	6878	82.1881
母3346-2	6545.67	99.8091
17	6055.33	94.2245
枯10	6927.67	94.6652
5-4	6943.67	99.7401
枯10	6901.67	89.111
S2	6928	99.8151
20	7104.67	91.0084
申慧1-1	7196.67	52.5883
S1	5973	99.8894
d-1-1	5594	99.7414
57	5944	99.5845
枯10	7407.67	44.2108
AW12	7370	94.7169
JDF-2	5589.67	99.8641
益生菌B2	7178.67	99.793
zjk-2	7220.33	99.8116
KC-1	5557	98.3654
枯5	5351.67	99.7105
A15	6790.33	99.6134
A69-3	7237.33	99.758
BSH-1	7345.33		2.98742
5-4	6707	91.5903
天1	6924.33	88.3697
mma枯	7170.33	99.8781
AW20	7070.67	99.5293
D1-2-2	6158.67	44.3097
BS5-2	6152	99.5328
S3	7032.67	99.7838
样品	6531.33	63.4773
绿贝	6809.33	99.7929
BL	6691	64.1348
地衣	6165	64.9527
益生菌b2	6485	99.6508
TM-1	4880	35.5428
P	6724.33				99.5675
P	7087.33				99.8169
P	7270.33				99.8089
C	7236.33			0.0100253
C	7454.67			0.00361714
C	7059.33			0
8-F2	6615.33	98.2303
MS1S42-1	7284	99.6857
A15	7466.67	99.866
AW425-3	7510	99.691
治-1	7346.67	99.7728
BS1	7252.67	99.8263
A10	7069	97.82
SF1-1-2	6311.67	95.4935
F2-1	6451.67	94.0929
3-1	7419.67	98.8593
A4	7391.33	99.9054
467-2-2	7373.33	99.8118
WS84	6938	85.582
BS32	7323	99.4982
4-1	6525.67	91.3621
A64-4	6589.67	99.6925
WA8	7497		17.6555
AW5	7040	99.8386
A13	6919.67	99.7689
4AYM	7041	91.3975
BS21	7508.67	94.7811
SK9-2	7286.33	98.9472
SYM1-2	6959	98.2987
149-1	6246.33	93.9454
150-1	6818	99.6466
151-1	7127.67	99.5984
152-2	7499.67	99.7059
153-1	6952.67	98.7531
154-2	7287	97.9639
155-1	7347.67	99.8574
156-3	6749.33	89.9141
157-1	6732	99.557
158-2	6804.33	96.3532
159-1	7177	99.7359
160-1	6901	96.0632
161-2	7528	99.834
162-1	6999	99.8263
163-3	7312	99.6286
164-1	6958.67	99.7425
165-2	6630	99.6603
166-1	6613	86.902
167-1	7456.33	99.6894
168-2	7506.67	99.8179
169-1	7431	99.7934
170-3	7243	99.1418
171-1	7545	99.8565
172-2	7278.67	99.8701
173-1	6614.33	99.6594
174-1	6334.67	98.9353
175-2	6572.67	93.4062
176-1	7443.67	99.2684
177-3	7101	94.3559
178-1	6872.67	94.6046
179-2	7173.67	97.8757
180-1	7301	97.061
181-1	6329.67	98.3356
182-2	6852.33	98.7821
183-1	6591	99.7844
184-3	7100.33	98.5465
185-1	7247.33	99.6116
186-2	7195.67	98.8716
187-1	7160	94.3943
188-1	7352.33	99.8107
189-2	6230.33	95.723
190-1	6409.67	99.2616
191-3	6769	92.704
192-1	7273.67	98.82
193-2	7135	99.6915
194-1	7195.67	99.8078
195-1	7262.67	99.8909
196-2	6782.67	99.5459
197-1	6706	99.6278
198-3	6692	99.7132
199-1	7316	99.792
200-2	7018	89.0618
201-1	7260.67	98.465
202-3	7050	98.4612
203-1	7480	99.8479
204-2	7272.67	99.8394
205-1	6273	93.495
206-1	6282.67	99.6224
207-2	6949.67	99.6388
208-1	6671	95.2765
CZ-25	7005.33	99.207
CZ-26-1	6895.33	95.715
CZ-27	6603.33	94.8824
CZ-28-2	7028	99.6707
CZ-29	5331.67	90.5913
	5323.33					26.8435
	5171.8					27.7966
	5556.03					28.2624
	5379.56					28.9009
	5000.2					26.5289
	5487.59					23.363
	5791.76					21.3509
	5602.54					22.8452
	5448.07					24.2779
	5105.67					26.2353
	5207.69					24.4988
	5307.42					25.1987
	5412.69					18.1106
	5025.51					21.005
	5324.17					21.7122
	5224.21					21.4273
	4821.58					21.3371
	4699.06					20.438

## Sheet: Fig1 d
GAPDH			N protein

## Sheet: Fig1 e
BSH-1		EC50				CC50
Drug Concentration (μg/mL)(log10)		Mean	SD	N		Mean	SD	N
3.69897		-0.59864	0.503238	4		100.081	0	3
3.39794		-0.982963	1.19368	4		100.081	0	3
3.09691		8.58241	3.39603	4		100.081	0	3
2.79588		30.3436	0.71025	4		100.081	0	3
2.49415		64.7277	0.349918	4		100.081	0	3
2.19312		98.8641	1.01533	4		100.081	0	3
1.89209		98.6762	1.07253	4		100.081	0	3
1.59106		99.3765	0.659484	4		100.081	0	3
1.30103		98.6762	1.07253	4		100.081	0	3
1		99.3765	0.659484	4		80.7754	0.337557	3
0.69897		98.1553	1.06593	4		25.3094	1.30737	3
0.39794		98.4712	1.24289	4		-4.99752	1.83729	3
D1-1		EC50				CC50
Drug Concentration (μg/mL)(log10)		Mean	SD	N		Mean	SD	N
3.69897		-0.455055	1.06211	4		100.081	0	3
3.39794		-0.171123	0.247659	4		100.081	0	3
3.09691		-0.0899999	0.866008	4		100.081	0	3
2.79588		12.0623	0.744392	4		100.081	0	3
2.49415		31.2966	1.42297	4		100.081	0	3
2.19312		76.5472	1.23051	4		100.081	0	3
1.89209		95.4814	2.04517	4		100.081	0	3
1.59106		99.132	5.16961	4		100.081	0	3
1.30103		102.442	1.85747	4		93.7099	0.17389	3
1		101.639	2.53872	4		84.768	0.417942	3
0.69897		102.442	1.85747	4		43.6958	1.53893	3
0.39794		101.639	2.53872	4		32.5575	1.84292	3
Yanping		EC50				CC50
Drug Concentration (μg/mL)(log10)		Mean	SD	N		Mean	SD	N
3.69897		-1.6824	0.121002	4		100.081	0	3
3.39794		41.5631	1.24029	4		100.081	0	3
3.09691		64.0389	1.55864	4		100.081	0	3
2.79588		102.765	1.06126	4		100.081	0	3
2.49415		102.603	0.958744	4		100.081	0	3
2.19312		101.188	0.303368	4		100.081	0	3
1.89209		100.736	0.840818	4		97.0979	0.0672284	3
1.59106		100.978	0.781734	4		65.8022	0.772487	3
1.30103		100.736	0.840818	4		26.4492	1.65932	3
1		100.978	0.781734	4		21.3244	1.77481	3
0.69897		100.736	0.840818	4		6.44924	1.65932	3
0.39794		100.978	0.781734	4		1.32443	1.77481	3
DZJF-2		EC50				CC50
Drug Concentration (μg/mL)(log10)		Mean	SD	N		Mean	SD	N
3.69897		2.42522	1.01439	4		100.081	0	3
3.39794		5.50841	0.251916	4		100.081	0	3
3.09691		37.6547	0.90694	4		100.081	0	3
2.79588		73.3061	3.13669	4		100.081	0	3
2.49415		100.722	1.85143	4		100.081	0	3
2.19312		100.819	1.35677	4		100.081	0	3
1.89209		101.152	0.473567	4		100.081	0	3
1.59106		100.162	0.609695	4		100.081	0	3
1.30103		100.333	0.578445	4		93.1854	0.0844592	3
1		102.726	0.718597	4		81.4103	0.22868	3
0.69897		100.333	0.578445	4		15.9381	1.03058	3
0.39794		102.726	0.718597	4		3.72972	1.18011	3
5-1		EC50				CC50
Drug Concentration (μg/mL)(log10)		Mean	SD	N		Mean	SD	N
3.69897		0.515714	0.608687	4		100.081	0	3
3.39794		8.78802	0.890974	4		100.081	0	3
3.09691		16.0357	1.05844	4		100.081	0	3
2.79588		67.119	0.339143	4		100.081	0	3
2.49415		100.65	1.04546	4		100.081	0	3
2.19312		100.333	0.579722	4		100.081	0	3
1.89209		100.658	0.815494	4		100.081	0	3
1.59106		100.991	0.823623	4		100.081	0	3
1.30103		101.416	0.327059	4		88.7916	0.240134	3
1		99.2419	1.55331	4		25.9414	1.57699	3
0.69897		101.416	0.327059	4		6.09651	1.9991	3
0.39794		99.2419	1.55331	4		7.9088	1.96055	3
Tianjing		EC50				CC50
Drug Concentration (μg/mL)(log10)		Mean	SD	N		Mean	SD	N
3.69897		0.376231	1.74909	4		100.081	0	3
3.39794		6.34029	3.76165	4		100.081	0	3
3.09691		32.433	1.79776	4		100.081	0	3
2.79588		66.3408	2.53265	4		100.081	0	3
2.49415		100.566	2.04454	4		100.081	0	3
2.19312		100.557	1.89056	4		100.081	0	3
1.89209		100.548	2.27199	4		100.081	0	3
1.59106		100.746	1.85501	4		100.081	0	3
1.30103		100.171	2.94915	4		96.6532	0.0599369	3
1		99.6572	1.94873	4		67.0288	0.577916	3
0.69897		100.171	2.94915	4		29.4406	1.23514	3
0.39794		99.6572	1.94873	4		5.54738	1.65291	3
WXL		EC50				CC50
Drug Concentration (μg/mL)(log10)		Mean	SD	N		Mean	SD	N
3.69897		-0.175655	0.80557	4		100.081	0	3
3.39794		-0.142346	1.25292	4		100.081	0	3
3.09691		-1.508	0.360159	4		100.081	0	3
2.79588		12.0569	2.84784	4		100.081	0	3
2.49415		85.7273	3.69124	4		100.081	0	3
2.19312		98.7343	0.444704	4		100.081	0	3
1.89209		98.7676	0.259971	4		100.081	0	3
1.59106		98.9175	0.400974	4		100.081	0	3
1.30103		99.4254	1.2123	4		83.9062	0.426853	3
1		98.4595	0.361824	4		43.606	1.49037	3
0.69897		99.4254	1.2123	4		9.07317	2.40168	3
0.39794		98.4595	0.361824	4		6.07516	2.4808	3
WA8		EC50				CC50
Drug Concentration (μg/mL)(log10)		Mean	SD	N		Mean	SD	N
3.69897		-0.944038	0.895094	4		100.081	0	3
3.39794		3.0058	3.23204	4		100.081	0	3
3.09691		19.8158	1.03991	4		100.081	0	3
2.79588		51.4987	3.31603	4		100.081	0	3
2.49415		75.1219	4.70932	4		100.081	0	3
2.19312		105.011	1.78371	4		100.081	0	3
1.89209		104.278	1.27078	4		100.081	0	3
1.59106		99.8484	4.43096	4		100.081	0	3
1.30103		104.026	0.670933	4		86.4301	0.259589	3
1		105.415	1.97952	4		34.5244	1.24663	3
0.69897		104.026	0.670933	4		14.0125	1.63669	3
0.39794		105.415	1.97952	4		3.2003	1.84229	3

## Sheet: Fig1 F
Fluorescence
WXL	5.16664	20.9386	96.8594	8.39503	17.2424	47.8617	15.1666	65.1666	90.9386	14.7604	34.1426	51.2711
5-1	8.36864	23.6294	98.0669	5.26818	18.247	94.1668	18.3686	38.3686	93.6294	3.89253	39.9624	55.1505
WA8	6.39279	93.0004	97.9559	10.2719	18.5474	97.3656	6.39279	66.3928	93.0004	0.534759	46.2181	65.5169
BSH-1	0.505873	41.6416	94.3568	20.5605	15.4046	63.149	10.5059	50.5059	81.6416	0.122466	10.4395	33.4369
D1-1	13.693	43.5976	94.6106	9.1857	26.3563	96.7705	3.69301	23.693	63.5976	2.93224	13.9861	30.2849
DZJF-2	9.16351	32.6299	92.7858	4.72178	21.1885	76.6708	9.16351	29.1635	72.6299	2.38841	9.27147	24.2072
Yanping	2.685	84.7462	94.0129	13.2074	71.5453	96.6226	12.685	82.685	94.7462	0	41.0184	48.7658
Tianjing	1.92506	84.6835	95.9303	7.69676	40.2823	93.936	11.9251	51.9251	84.6835	0.958962	7.90026	22.987
RT-PCR
WXL	6.26341	23.9309	99.3931	4.51134	42.6099	92.6528	25.05	75.6893	98.7902	0.263409	0.912348	18.2285	27.1315	99.3609	94.8657
5-1	0.236089	57.0834	98.7083	4.41675	39.2683	52.1804	12.3641	22.5272	56.7573	0.236089	1.05942	6.34587	43.9462	91.6098	97.5971
WA8	2.5136	48.6828	94.8683	3.21921	39.817	73.493	22.0754	46.5097	93.0365	0.513595	0.927368	71.119	21.2486	66.3207	90.8983
BSH-1	0.0280251	31.5745	93.1575	3.80546	35.9232	93.8905	2.02651	21.111	66.6845	1.02803	0.770228	16.8586	17.0494	49.3214	99.7109
D1-1	23.4198	73.3852	97.3385	0.0744802	9.40455	75.5425	3.69076	26.4537	53.454	0.419752	0.862119	16.5334	70.2563	92.983	95.3059
DZJF-2	20.1593	38.3354	87.8335	0.471343	1.78326	26.7944	4.49793	19.8768	59.6777	1.15928	1.31782	6.51925	23.4046	53.5696	98.7204
Yanping	18.6604	53.3113	99.3311	1.44772	15.7209	18.3245	4.24672	62.3456	99.778	0.660372	3.57726	5.80152	25.0446	44.1481	51.855
Tianjing	7.38484	99.968	99.1968	38.848	51.5065	90.7794	50.18	78.3624	99.1093	0.384838	2.01411	20.0576	26.6324	87.8405	98.1401
TCID50
WXL	3.76923	6.33333	7.5	5.8	6.33333	7.5	6.42857	7.42857	7.5	5.42857	6.42857	6.88235	6.2	7.57143	7.57143
5-1	5.33333	6.42857	7.5	6.57143	7.42857	7.57143	6.66667	7.33333	7.42857	5.33333	6.42857	7.33333	6.33333	7.33333	7.8
WA8	5.33333	6.66667	7.57143	5.57143	7.42857	7.33333	5.33333	7.42857	7.5	6.42857	7	7.57143	6.42857	7.66667	7.5
BSH-1	3.28947	6.33333	7.66667	5.33333	6.57143	7.5	5.28947	6.33333	7.42857	5.42857	6.57143	7.57143	6.42857	7.8	7.42857
D1-1	5.8	6.42857	7.5	3	6.42857	6.8	4.5	6.42857	7.42857	5.57143	5.33333	6.28947	6	7.42857	7.57143
DZJF-2	6.57143	7.2	7.57143	5.66667	5.42857	7.42857	6.33333	7.2	7.5	4.57143	6.57143	6.5	7	7.5	7.66667
Yanping	6.33333	7.5	7.66667	5.42857	5.42857	6.42857	6.5	7.2	7.42857	6.5	7.2	7.66667	6.5	7.57143	7.66667
Tianjing	4.5	6	7.57143	5.8	6.5	7.33333	6.8	7	7.42857	5.2	6.2	6.8	6.42857	7.42857	7.66667

## Sheet: Supplementary Fig.1 a
1	0.989073
2	0.994631
3	0.995919
4	0.991372
5	0.99229
6	0.99905
7	0.998356
8	0.994146
9	0.993697
10	0.989861
11	0.998973
12	0.999299
13	1
14	1
15	0.999717
16	0.99767
17	0.998893
18	0.998958

## Sheet: Supplementary Fig.1 b
1	4.62684
2	4.16964
3	3.73583
4	4.54054
5	3.36193
6	3.81389
7	3.88344
8	4.45649
9	3.61266
10	3.38071
11	3.40406
12	3.87037
13	3.82658
14	3.94199
15	3.76095
16	3.71897
17	4.55813
18	4.55461

## Sheet: Supplementary Fig.1 c
	Libary	NC	Mock	RBV
	84.2363	0	98.8502	26.8435
	99.1774	0	99.0305	27.7966
	92.2916	0	99.0606	28.2624
	92.8619	0	98.9737	28.9009
	99.3888	0	98.8387	26.5289
	98.0472	0	99	23.363
	99.0297	0	99.1263	21.3509
	74.5218	0	99.3866	22.8452
	95.5434	0	99.0325	24.2779
	99.2788	0	99.566	26.2353
	99.4227	0.000401012	99.8249	24.4988
	99.4195	0.000144686	99.8488	25.1987
	95.1401	0.000401012	99.566	18.1106
	81.8395	0.000144686	99.8249	21.005
	99.2028	0	99.8488	21.7122
	87.7635	0.000200506	99.5671	21.4273
	93.346	7.23428e-05	99.8189	21.3371
	99.1208	0	99.8189	20.438
	96.4027
	95.8691
	94.5521
	99.3141
	98.9049
	95.3729
	98.8103
	99.291
	95.5218
	96.9812
	96.3942
	97.6054
	95.1525
	98.5336
	91.6284
	97.1585
	97.2272
	96.9477
	97.5168
	99.3211
	64.5422
	82.2605
	82.2071
	78.5741
	99.4214
	92.0201
	80.4574
	99.3192
	95.5166
	77.6799
	91.294
	96.291
	99.0875
	95.338
	99.2651
	99.1023
	95.7848
	98.8446
	74.7664
	99.26
	90.7868
	91.3137
	91.2338
	87.4428
	99.1737
	77.197
	91.7238
	96.598
	90.8111
	92.1978
	85.3765
	96.2134
	99.1885
	86.1516
	71.2808
	93.7594
	99.4276
	70.5771
	90.2629
	98.8919
	89.5068
	94.7762
	98.4876
	99.1538
	91.8065
	99.4042
	98.1258
	99.3607
	99.3783
	49.5587
	95.6527
	99.3609
	99.3754
	99.3385
	93.1552
	99.1898
	97.3645
	96.5925
	97.8445
	98.8865
	97.5924
	99.1919
	98.9415
	99.2444
	98.3351
	98.7679
	82.5235
	71.2852
	99.3511
	90.5738
	76.1356
	99.4802
	84.4482
	70.0219
	98.6945
	99.3558
	99.4541
	99.0981
	99.4375
	99.3683
	99.3296
	98.5181
	98.6372
	99.2564
	99.4018
	97.8224
	98.9817
	85.272
	97.086
	98.7108
	98.4157
	88.3434
	98.292
	99.4533
	99.3339
	97.8831
	99.3922
	96.4205
	90.4511
	99.4175
	89.099
	99.1533
	99.3198
	93.8021
	99.3937
	96.1238
	99.029
	91.506
	99.5093
	99.307
	96.4523
	99.3504
	99.342
	99.3407
	99.0315
	97.1089
	59.9427
	99.351
	96.5898
	99.2996
	99.1989
	99.267
	99.1089
	95.6177
	96.1855
	99.5502
	97.7609
	99.4656
	98.2824
	96.1915
	84.144
	98.4549
	99.5404
	99.5759
	99.5632
	99.379
	99.3869
	98.7599
	96.3223
	97.0706
	99.53
	99.3261
	99.5755
	98.5837
	95.9618
	95.538
	95.3092
	91.508
	97.0647
	97.537
	99.5662
	99.289
	99.0727
	83.2762
	98.9973
	82.7856
	99.5727
	90.8675
	98.7215
	89.6311
	99.4575
	98.9742
	99.1291
	99.4757
	93.603
	93.4773
	89.7313
	99.3248
	84.9116
	98.6773
	99.1724
	99.5201
	99.5391
	99.2392
	82.4492
	99.455
	84.1601
	89.9809
	99.3761
	99.4364
	99.5455
	99.329
	85.2352
	99.4656
	99.3495
	33.0372
	78.874
	89.7447
	86.69
	99.62
	92.9948
	91.5874
	99.2419
	98.8262
	99.3844
	91.841
	88.3539
	99.5273
	97.1461
	99.4214
	99.211
	98.813
	99.3937
	99.7844
	99.8448
	99.8687
	99.7871
	99.8056
	82.9821
	67.5985
	56.6544
	99.7235
	99.8661
	99.8988
	0.010632
	99.3514
	35.1447
	99.747
	99.5411
	99.8272
	99.8042
	19.434
	56.2565
	93.4694
	99.8027
	49.5184
	99.5989
	99.7458
	99.7621
	93.659
	99.8234
	99.7678
	11.8436
	99.6515
	77.5097
	99.6969
	70.1144
	99.8694
	99.831
	98.5353
	99.4604
	99.7077
	26.8091
	99.6758
	99.8525
	99.8393
	4.31295
	99.9085
	99.9111
	99.6344
	1.91554
	49.9591
	99.7909
	52.4799
	54.5326
	81.7427
	99.828
	94.4645
	94.7856
	99.7622
	88.1385
	99.8114
	90.9512
	52.3578
	99.898
	99.7507
	99.5437
	44.202
	94.5129
	99.8859
	99.816
	99.8126
	98.1901
	99.7029
	99.6738
	99.7505
	19.8252
	91.5506
	87.6144
	99.8615
	99.5673
	45.6803
	99.5429
	99.7597
	64.5502
	99.7971
	66.1655
	66.074
	99.6476
	35.1822
	99.3428
	99.7923
	99.8109
	99.8587
	99.7909
	99.7983
	83.0274
	66.3793
	55.5908
	99.7126
	99.8777
	99.8941
	0
	99.4217
	35.9207
	99.751
	99.526
	99.8091
	99.7983
	25.343
	55.9044
	93.9563
	99.7852
	49.0012
	99.604
	99.7625
	99.7797
	94.1688
	99.8292
	99.7724
	11.4021
	99.6555
	77.2122
	99.7253
	70.1266
	99.8668
	99.8367
	98.5815
	99.5232
	99.6961
	26.4807
	99.6635
	99.8473
	99.823
	0
	99.9161
	99.9037
	99.6606
	0
	50.1327
	99.7991
	52.0035
	54.1561
	82.1881
	99.8091
	94.2245
	94.6652
	99.7401
	89.111
	99.8151
	91.0084
	52.5883
	99.8894
	99.7414
	99.5845
	44.2108
	94.7169
	99.8641
	99.793
	99.8116
	98.3654
	99.7105
	99.6134
	99.758
	19.9874
	91.5903
	88.3697
	99.8781
	99.5293
	44.3097
	99.5328
	99.7838
	63.4773
	99.7929
	64.1348
	64.9527
	99.6508
	35.5428
	98.2303
	99.6857
	99.866
	99.691
	99.7728
	99.8263
	97.82
	95.4935
	94.0929
	98.8593
	99.9054
	99.8118
	85.582
	99.4982
	91.3621
	99.6925
	19.6555
	99.8386
	99.7689
	91.3975
	94.7811
	98.9472
	98.2987
	93.9454
	99.6466
	99.5984
	99.7059
	98.7531
	97.9639
	99.8574
	89.9141
	99.557
	96.3532
	99.7359
	96.0632
	99.834
	99.8263
	99.6286
	99.7425
	99.6603
	86.902
	99.6894
	99.8179
	99.7934
	99.1418
	99.8565
	99.8701
	99.6594
	98.9353
	93.4062
	99.2684
	94.3559
	94.6046
	97.8757
	97.061
	98.3356
	98.7821
	99.7844
	98.5465
	99.6116
	98.8716
	94.3943
	99.8107
	95.723
	99.2616
	92.704
	98.82
	99.6915
	99.8078
	99.8909
	99.5459
	99.6278
	99.7132
	99.792
	89.0618
	98.465
	98.4612
	99.8479
	99.8394
	93.495
	99.6224
	99.6388
	95.2765
	99.207
	95.715
	94.8824
	99.6707
	90.5913

## Sheet: Supplementary Fig.1 d
	Libary	NC	Mock	RBV
	5602.67	6379.33	5064	5323.33
	6854.67	6980.33	6371.67	5171.8
	6067.33	7577.67	6683.67	5556.03
	6302	8206.67	6955.87	5379.56
	7300	6458.63	7446.83	5000.2
	6037.33	6421.07	6900.6	5487.59
	7072	6848.07	6932	5791.76
	6448	6931.33	7329.67	5602.54
	5701.67	6991.67	7560.67	5448.07
	6744.33	7508.67	5993.67	5105.67
	7087	6716.33	6280	5207.69
	7020.67	6927.33	6370	5307.42
	6499.67	6505.33	5628.33	5412.69
	6385	5977.67	5933	5025.51
	6809.67	5826.33	5963.67	5324.17
	6277.33	6536.33	6024.33	5224.21
	5795.33	6754.67	6387.33	4821.58
	6745	6359.33	6570.33	4699.06
	6782
	6822.67
	7124
	6637
	6768
	6699.33
	6454.33
	6642.67
	6610.33
	7065.33
	6950.67
	6445
	6898.33
	6026.67
	6297.67
	6586.67
	6709.67
	6643.33
	6945.33
	6453
	6886.33
	6392
	6772
	6668
	7251.33
	6540.33
	6850
	6708.67
	6349
	6350.67
	6212.67
	6910.67
	6578
	7226.67
	6506
	6178.33
	6628
	6160.67
	6612
	6896.67
	7246
	7167
	6852.33
	6548
	6525
	6925.67
	6756.33
	6547.33
	6540
	6819.67
	7631
	6987.67
	7024
	6634.33
	6929.33
	6042
	6844.67
	7058.67
	6679
	6644
	7193.67
	6748.33
	6430.7
	7104.33
	6559.53
	7182.4
	6579.67
	6388.73
	7518.03
	7097.17
	6149.03
	7653.83
	7361.37
	6779.5
	6870.7
	7501.57
	6571
	6880.53
	5250.5
	6306.43
	4874.23
	5000.07
	6746.3
	7208.6
	6828.57
	6484.07
	6661.63
	7161.6
	7107.9
	6723.93
	6387.97
	6873.67
	6607.87
	6870.23
	6852.57
	7664.97
	7469.67
	6404
	7249.37
	7168.8
	7098.47
	6733.5
	6726.53
	7655.87
	7524.53
	6508.57
	7189.47
	6789.27
	6499.57
	7016.57
	6544.07
	6906.97
	6898.67
	7188.97
	6998.23
	6749.97
	6856.3
	7029.53
	6880.23
	7770.87
	7069.53
	7583.83
	7071.97
	6645
	7099.97
	6569.73
	6830.77
	7261.1
	6896.43
	7719.13
	6638.87
	6884.73
	7196.37
	7552.43
	7318.13
	6454.63
	7296.57
	7741.5
	6774.63
	7223.7
	7145.9
	7714.47
	6281.33
	6436
	6047.33
	7350
	6533.33
	6859.67
	6954
	6952.33
	6135.67
	6758.33
	7353
	7609.67
	7026
	7020
	5967
	6847
	5915.67
	6707.33
	6814
	6631.67
	7098
	6191.33
	6332.67
	6356.67
	6028.67
	6765
	5943
	6557
	7201
	6128.67
	6528.33
	6505.33
	6527
	6980
	7046.67
	6493.67
	6134.33
	6135
	6996
	6746
	6885
	7276
	6874.33
	6777.67
	6613.67
	6924.33
	6698.67
	6581
	7135.33
	7522
	7237.33
	5967.67
	6590
	6604.67
	4321.67
	6000.67
	6480.67
	7397
	7278.33
	7285
	6842
	6873
	6832.67
	6179.67
	6953.67
	6896
	6950.33
	6317.67
	6538
	6335.33
	6963.67
	6156.33
	7464
	7392.33
	6960.33
	7357
	7074.33
	6921.67
	7104
	6397
	7079.67
	7269
	7989.67
	7819.33
	7376
	7432
	6470.67
	6377.33
	6114
	7481.67
	7566.33
	7490
	6326.67
	7463.67
	6787.33
	7294
	6756.67
	7242
	7103.33
	6565.33
	3569.67
	6271.67
	6872
	6392.67
	7147.33
	7197
	7843
	6766.67
	8035.67
	7739
	4258
	6810
	6868.67
	7592.67
	7281.33
	7740.33
	6931
	7071.33
	6467.33
	6927.33
	7048.33
	7835.67
	7976.67
	7578.33
	5793.33
	7357.67
	7557
	6602
	5230.67
	6781.33
	8154.33
	6952.33
	6787.33
	4591.67
	7592.67
	6195
	7201.67
	6612.33
	6738.67
	6258
	5608.33
	6798
	7388.33
	6928.67
	6468
	7063
	7351.67
	7347
	7234.33
	7197
	5525
	5641.33
	6761.67
	7307.67
	7882
	7633
	6016
	7856
	5126
	5081.67
	6360.33
	5288.67
	5273
	7269
	6306.33
	6467.67
	6620.67
	5734
	5859
	6633.33
	5871
	6560
	7064
	6794.67
	5971
	6251.33
	6789
	6614.67
	7093
	7376.67
	5027
	5935.33
	6137
	6322.33
	6643.33
	6782
	5568.33
	5117.67
	6715.33
	6716
	6573.33
	6731
	6345.67
	6334.67
	7073.67
	6626
	6347.67
	6550.33
	7317.67
	6248.33
	6800.67
	6297.33
	7475.33
	7601.67
	3191.33
	7124.67
	7422.67
	6829.33
	6201.33
	7536.67
	6469
	6796.67
	7477.67
	7631
	7286.33
	6656.33
	4392.33
	6358.67
	6668
	7408.67
	7516.33
	6878
	6545.67
	6055.33
	6927.67
	6943.67
	6901.67
	6928
	7104.67
	7196.67
	5973
	5594
	5944
	7407.67
	7370
	5589.67
	7178.67
	7220.33
	5557
	5351.67
	6790.33
	7237.33
	7345.33
	6707
	6924.33
	7170.33
	7070.67
	6158.67
	6152
	7032.67
	6531.33
	6809.33
	6691
	6165
	6485
	4880
	6615.33
	7284
	7466.67
	7510
	7346.67
	7252.67
	7069
	6311.67
	6451.67
	7419.67
	7391.33
	7373.33
	6938
	7323
	6525.67
	6589.67
	7497
	7040
	6919.67
	7041
	7508.67
	7286.33
	6959
	6246.33
	6818
	7127.67
	7499.67
	6952.67
	7287
	7347.67
	6749.33
	6732
	6804.33
	7177
	6901
	7528
	6999
	7312
	6958.67
	6630
	6613
	7456.33
	7506.67
	7431
	7243
	7545
	7278.67
	6614.33
	6334.67
	6572.67
	7443.67
	7101
	6872.67
	7173.67
	7301
	6329.67
	6852.33
	6591
	7100.33
	7247.33
	7195.67
	7160
	7352.33
	6230.33
	6409.67
	6769
	7273.67
	7135
	7195.67
	7262.67
	6782.67
	6706
	6692
	7316
	7018
	7260.67
	7050
	7480
	7272.67
	6273
	6282.67
	6949.67
	6671
	7005.33
	6895.33
	6603.33
	7028
	5331.67

## Sheet: Supplementary Fig2a
BSH-1		CC50				EC50
Drug Concentration (μg/mL)(log10)		Mean	SD	N		Mean	SD	N
3.69897		-4.14142	1.00346	4		100.051	0	3
3.39794		-4.96017	0.682803	4		100.051	0	3
3.09691		50.3514	5.337	4		100.051	0	3
2.79588		85.0577	0.731565	4		100.051	0	3
2.49415		102.183	4.01683	4		100.051	0	3
2.19312		105.163	5.28949	4		100.051	0	3
1.89209		97.6574	2.2828	4		98.2241	1.56498	3
1.59106		95.6333	1.99225	4		77.855	7.09874	3
1.30103		98.1351	1.6144	4		61.392	3.29966	3
1		96.5658	1.76638	4		13.4618	3.2687	3
0.69897		99.2267	4.48167	4		3.14133	2.56695	3
0.39794		96.7477	4.09648	4		1.711	0.845555	3
D1-1		CC50				EC50
Drug Concentration (μg/mL)(log10)		Mean	SD	N		Mean	SD	N
3.69897		-8.25966	0.763247	4		100.051	0	3
3.39794		-2.42664	1.88678	4		100.051	0	3
3.09691		-0.286804	1.80112	4		100.051	0	3
2.79588		34.7747	1.01774	4		100.051	0	3
2.49415		53.7004	0.938984	4		100.03	0.0183713	3
2.19312		80.6147	1.2354	4		100.051	0	3
1.89209		89.7605	2.58185	4		98.9846	0.768486	3
1.59106		92.5027	0.354903	4		90.4728	3.50636	3
1.30103		101.997	5.41076	4		50.2676	16.1554	3
1		98.4625	2.0427	4		28.2884	11.0262	3
0.69897		100.903	3.62098	4		6.0375	4.44633	3
0.39794		101.442	1.81409	4		2.07153	2.43102	3
Yanping		CC50				EC50
Drug Concentration (μg/mL)(log10)		Mean	SD	N		Mean	SD	N
3.69897		-11.8411	0.680461	4		100.051	0	3
3.39794		-6.07223	1.98048	4		100.051	0	3
3.09691		19.0099	4.66464	4		100.051	0	3
2.79588		87.8603	3.42234	4		100.051	0	3
2.49415		95.109	10.2679	4		100.038	0.0234761	3
2.19312		94.181	2.91053	4		100.042	0.0167899	3
1.89209		99.3479	8.49712	4		94.8972	3.6647	3
1.59106		102.759	5.81407	4		64.8264	2.78269	3
1.30103		98.7961	5.74674	4		21.0157	3.98096	3
1		96.1374	6.87103	4		5.39717	2.3277	3
0.69897		99.4733	6.40977	4		5.98571	4.62661	3
0.39794		96.4885	1.49121	4		3.39575	0.979333	3
DZJF-2		CC50				EC50
Drug Concentration (μg/mL)(log10)		Mean	SD	N		Mean	SD	N
3.69897		-4.22279	1.45699	4		100.051	0	3
3.39794		20.67	12.9047	4		100.051	0	3
3.09691		80.3036	2.03417	4		100.051	0	3
2.79588		90.5603	3.99468	4		100.051	0	3
2.49415		96.4147	1.91454	4		100.051	0	3
2.19312		100.635	2.17382	4		100.027	0.0273363	3
1.89209		94.7128	5.83383	4		96.7092	4.24972	3
1.59106		95.9836	2.01398	4		26.0088	19.7435	3
1.30103		108.056	4.69332	4		12.7475	8.98311	3
1		99.115	1.6851	4		0.820628	1.23196	3
0.69897		105.287	10.2597	4		6.06709	3.26891	3
0.39794		106.558	1.27289	4		1.97045	1.60765	3
5-1		CC50				EC50
Drug Concentration (μg/mL)(log10)		Mean	SD	N		Mean	SD	N
3.69897		-4.59258	0.638943	4		100.051	0	3
3.39794		-3.90267	0.474211	4		100.051	0	3
3.09691		63.1493	9.07454	4		100.051	0	3
2.79588		81.3844	3.23182	4		100.04	0.0202926	3
2.49415		81.8245	2.68855	4		100.051	0	3
2.19312		85.9639	4.52208	4		100.035	0.0276989	3
1.89209		95.0636	2.12038	4		97.1951	4.51462	3
1.59106		95.4561	4.05433	4		42.2527	7.72467	3
1.30103		94.0287	5.10406	4		8.89214	4.27346	3
1		102.7	4.78969	4		2.98095	1.50131	3
0.69897		104.817	4.51216	4		1.92152	0.772234	3
0.39794		98.5845	3.93334	4		1.37405	2.0789	3
Tianjing		CC50				EC50
Drug Concentration (μg/mL)(log10)		Mean	SD	N		Mean	SD	N
3.69897		-4.47185	0.37625	4		100.051	0	3
3.39794		-4.19764	0.313919	4		100.051	0	3
3.09691		61.373	1.13051	4		100.051	0	3
2.79588		74.0698	2.94543	4		100.051	0	3
2.49415		82.3675	3.96915	4		100.03	0.0371021	3
2.19312		84.4777	7.99851	4		100.037	0.0246303	3
1.89209		95.1716	3.04689	4		93.7371	0.25841	3
1.59106		95.5412	0.999168	4		55.7227	0.969111	3
1.30103		92.1792	3.7174	4		23.0472	2.64322	3
1		93.2641	3.12136	4		2.81055	2.15289	3
0.69897		95.2312	0.699781	4		4.37315	3.74978	3
0.39794		101.013	2.67005	4		3.85737	2.80255	3
WXL		CC50				EC50
Drug Concentration (μg/mL)(log10)		Mean	SD	N		Mean	SD	N
3.69897		-3.68741	1.19263	4		100.051	0	3
3.39794		-3.39297	1.26933	4		100.051	0	3
3.09691		60.6402	1.11506	4		100.051	0	3
2.79588		70.0856	4.33718	4		100.041	0.0176639	3
2.49415		72.9357	3.67319	4		100.051	0	3
2.19312		83.1467	2.33876	4		100.041	0.0176639	3
1.89209		92.6156	2.19955	4		100.006	0.0505658	3
1.59106		96.6435	0.475002	4		100.036	0.0273037	3
1.30103		99.364	2.5006	4		96.9605	2.22256	3
1		98.8929	3.7921	4		44.7302	15.3132	3
0.69897		98.7634	0.860523	4		15.2475	2.74138	3
0.39794		101.507	2.53906	4		4.72276	0.935941	3
WA8		CC50				EC50
Drug Concentration (μg/mL)(log10)		Mean	SD	N		Mean	SD	N
3.69897		-4.02895	0.685381	4		100.051	0	3
3.39794		-3.54608	0.440876	4		100.041	0.0176746	3
3.09691		28.4764	1.13421	4		100.031	0.035489	3
2.79588		82.3458	5.34103	4		100.051	0	3
2.49415		88.4465	9.18928	4		100.051	0	3
2.19312		102.98	2.26157	4		100.03	0.0214162	3
1.89209		97.091	1.54864	4		96.0915	2.61345	3
1.59106		103.675	4.77988	4		37.2664	17.8358	3
1.30103		97.4679	1.06942	4		12.5533	6.18349	3
1		97.3972	1.62305	4		18.0113	16.4826	3
0.69897		99.3522	2.31203	4		3.85728	3.06086	3
0.39794		97.9743	0.96727	4		2.50957	1.34325	3

## Sheet: Supplementary Fig 2b
BSH-1		CC50				EC50
Drug Concentration (μg/mL)(log10)		Mean	SD	N		Mean	SD	N
3.69897		-4.14142	1.00346	4		100	0	3
3.39794		-4.96017	0.682803	4		100	0	3
3.09691		50.3514	5.337	4		100	0	3
2.79588		85.0577	0.731565	4		99.7559	0.422834	3
2.49415		102.183	4.01683	4		96.6225	5.14217	3
2.19312		105.163	5.28949	4		99.3248	0.429159	3
1.89209		97.6574	2.2828	4		97.7279	2.68071	3
1.59106		95.6333	1.99225	4		76.8002	0.951066	3
1.30103		98.1351	1.6144	4		8.95288	2.78339	3
1		96.5658	1.76638	4		1.05635	4.60815	3
0.69897		99.2267	4.48167	4		3.1383	2.17623	3
0.39794		96.7477	4.09648	4		2.74162	4.15642	3
D1-1		CC50				EC50
Drug Concentration (μg/mL)(log10)		Mean	SD	N		Mean	SD	N
3.69897		-8.25966	0.763247	4		100.051	0	3
3.39794		-2.42664	1.88678	4		100.051	0	3
3.09691		-0.286804	1.80112	4		100.051	0	3
2.79588		34.7747	1.01774	4		100.051	0	3
2.49415		53.7004	0.938984	4		100.03	0.0183713	3
2.19312		80.6147	1.2354	4		100.051	0	3
1.89209		89.7605	2.58185	4		98.9846	0.768486	3
1.59106		92.5027	0.354903	4		90.4728	3.50636	3
1.30103		101.997	5.41076	4		50.2676	16.1554	3
1		98.4625	2.0427	4		28.2884	11.0262	3
0.69897		100.903	3.62098	4		6.0375	4.44633	3
0.39794		101.442	1.81409	4		2.07153	2.43102	3
Yanping		CC50				EC50
Drug Concentration (μg/mL)(log10)		Mean	SD	N		Mean	SD	N
3.69897		-11.8411	0.680461	4		100.051	0	3
3.39794		-6.07223	1.98048	4		100.051	0	3
3.09691		19.0099	4.66464	4		100.051	0	3
2.79588		87.8603	3.42234	4		100.051	0	3
2.49415		95.109	10.2679	4		100.038	0.0234761	3
2.19312		94.181	2.91053	4		100.042	0.0167899	3
1.89209		99.3479	8.49712	4		94.8972	3.6647	3
1.59106		102.759	5.81407	4		64.8264	2.78269	3
1.30103		98.7961	5.74674	4		21.0157	3.98096	3
1		96.1374	6.87103	4		5.39717	2.3277	3
0.69897		99.4733	6.40977	4		5.98571	4.62661	3
0.39794		96.4885	1.49121	4		3.39575	0.979333	3
DZJF-2		CC50				EC50
Drug Concentration (μg/mL)(log10)		Mean	SD	N		Mean	SD	N
3.69897		-4.22279	1.45699	4		100.051	0	3
3.39794		20.67	12.9047	4		100.051	0	3
3.09691		80.3036	2.03417	4		100.051	0	3
2.79588		90.5603	3.99468	4		100.051	0	3
2.49415		96.4147	1.91454	4		100.051	0	3
2.19312		100.635	2.17382	4		100.027	0.0273363	3
1.89209		94.7128	5.83383	4		96.7092	4.24972	3
1.59106		95.9836	2.01398	4		26.0088	19.7435	3
1.30103		108.056	4.69332	4		12.7475	8.98311	3
1		99.115	1.6851	4		0.820628	1.23196	3
0.69897		105.287	10.2597	4		6.06709	3.26891	3
0.39794		106.558	1.27289	4		1.97045	1.60765	3
5-1		CC50				EC50
Drug Concentration (μg/mL)(log10)		Mean	SD	N		Mean	SD	N
3.69897		-4.59258	0.638943	4		100.051	0	3
3.39794		-3.90267	0.474211	4		100.051	0	3
3.09691		63.1493	9.07454	4		100.051	0	3
2.79588		81.3844	3.23182	4		100.04	0.0202926	3
2.49415		81.8245	2.68855	4		100.051	0	3
2.19312		85.9639	4.52208	4		100.035	0.0276989	3
1.89209		95.0636	2.12038	4		97.1951	4.51462	3
1.59106		95.4561	4.05433	4		42.2527	7.72467	3
1.30103		94.0287	5.10406	4		8.89214	4.27346	3
1		102.7	4.78969	4		2.98095	1.50131	3
0.69897		104.817	4.51216	4		1.92152	0.772234	3
0.39794		98.5845	3.93334	4		1.37405	2.0789	3
Tianjing		CC50				EC50
Drug Concentration (μg/mL)(log10)		Mean	SD	N		Mean	SD	N
3.69897		-4.47185	0.37625	4		100.051	0	3
3.39794		-4.19764	0.313919	4		100.051	0	3
3.09691		61.373	1.13051	4		100.051	0	3
2.79588		74.0698	2.94543	4		100.051	0	3
2.49415		82.3675	3.96915	4		100.03	0.0371021	3
2.19312		84.4777	7.99851	4		100.037	0.0246303	3
1.89209		95.1716	3.04689	4		93.7371	0.25841	3
1.59106		95.5412	0.999168	4		55.7227	0.969111	3
1.30103		92.1792	3.7174	4		23.0472	2.64322	3
1		93.2641	3.12136	4		2.81055	2.15289	3
0.69897		95.2312	0.699781	4		4.37315	3.74978	3
0.39794		101.013	2.67005	4		3.85737	2.80255	3
WXL		CC50				EC50
Drug Concentration (μg/mL)(log10)		Mean	SD	N		Mean	SD	N
3.69897		-3.68741	1.19263	4		100.051	0	3
3.39794		-3.39297	1.26933	4		100.051	0	3
3.09691		60.6402	1.11506	4		100.051	0	3
2.79588		70.0856	4.33718	4		100.041	0.0176639	3
2.49415		72.9357	3.67319	4		100.051	0	3
2.19312		83.1467	2.33876	4		100.041	0.0176639	3
1.89209		92.6156	2.19955	4		100.006	0.0505658	3
1.59106		96.6435	0.475002	4		100.036	0.0273037	3
1.30103		99.364	2.5006	4		96.9605	2.22256	3
1		98.8929	3.7921	4		44.7302	15.3132	3
0.69897		98.7634	0.860523	4		15.2475	2.74138	3
0.39794		101.507	2.53906	4		4.72276	0.935941	3
WA8		CC50				EC50
Drug Concentration (μg/mL)(log10)		Mean	SD	N		Mean	SD	N
3.69897		-4.02895	0.685381	4		100.051	0	3
3.39794		-3.54608	0.440876	4		100.041	0.0176746	3
3.09691		28.4764	1.13421	4		100.031	0.035489	3
2.79588		82.3458	5.34103	4		100.051	0	3
2.49415		88.4465	9.18928	4		100.051	0	3
2.19312		102.98	2.26157	4		100.03	0.0214162	3
1.89209		97.091	1.54864	4		96.0915	2.61345	3
1.59106		103.675	4.77988	4		37.2664	17.8358	3
1.30103		97.4679	1.06942	4		12.5533	6.18349	3
1		97.3972	1.62305	4		18.0113	16.4826	3
0.69897		99.3522	2.31203	4		3.85728	3.06086	3
0.39794		97.9743	0.96727	4		2.50957	1.34325	3

[truncated: 107 more sheets: Fig.2C, Fig.2d, Fig.2e, Fig.2f, Fig.2j, Fig.2g, Supplementary Fig 3a, Supplementary Fig 3b, Supplementary Fig 3c, Supplementary Fig.4, Fig.3b, Fig.3 c,  Fig.3d,  Fig.3e, Fig.3 f, Fig.3g, Supplementary Fig.5 b, Supplementary Fig.5c, Supplementary Fig.5d, Supplementary Fig.5e …]
